# Supplementary material for: Chronic respiratory diseases are predictors of severe outcome in COVID-19 hospitalised patients: a nationwide study
Source: PubMed Central journal article supplement — Eur Respir J. 2021 Dec 9;58(6):2004474. doi: 10.1183/13993003.04474-2020 (PMC8135927; doi:10.1183/13993003.04474-2020), 2021-12-09

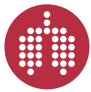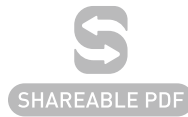

# Chronic respiratory diseases are predictors of severe outcome in COVID-19 hospitalised patients: a nationwide study

Guillaume Beltramo <sup>1,2,3,9</sup>, Jonathan Cottenet<sup>3,4,9</sup>, Anne-Sophie Mariet<sup>3,4,5,6</sup>, Marjolaine Georges<sup>1,3</sup>, Lionel Piroth<sup>3,5,6,7</sup>, Pascale Tubert-Bitter<sup>8</sup>, Philippe Bonniaud<sup>1,2,3,9</sup> and Catherine Quantin<sup>3,4,5,6,8,9</sup>

<sup>1</sup>Reference Constitutive Center for Rare Lung Diseases, Dept of Pulmonary Medicine and Intensive Care Unit, University Hospital, Dijon, France. <sup>2</sup>INSERM LNC-UMR 1231, Dijon, France. <sup>3</sup>University of Bourgogne-Franche-Comté, Dijon, France. <sup>4</sup>Biostatistics and Bioinformatics (DIM), Dijon University Hospital, Dijon, France. <sup>5</sup>INSERM, CIC 1432, Dijon, France. <sup>6</sup>Clinical Epidemiology/Clinical Trials Unit, Clinical Investigation Center, Dijon University Hospital, Dijon, France. <sup>7</sup>Infectious Diseases Dept, Dijon University Hospital, Dijon, France. <sup>8</sup>Université Paris-Saclay, UVSQ, Université Paris-Sud, Inserm, High-Dimensional Biostatistics for Drug Safety and Genomics, CESP, Villejuif, France. <sup>9</sup>These authors contributed equally to this work.

Corresponding author: Philippe Bonniaud ([philippe.bonnaud@chu-dijon.fr](mailto:philippe.bonnaud@chu-dijon.fr))

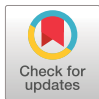

Shareable abstract (@ERSpublications)

There was a higher risk of developing severe COVID-19 and a higher mortality rate among patients with chronic respiratory diseases. This study suggests that these patients should have priority access to SARS-CoV-2 vaccination. <https://bit.ly/3bcp2HC>

**Cite this article as:** Beltramo G, Cottenet J, Mariet A-S, *et al.* Chronic respiratory diseases are predictors of severe outcome in COVID-19 hospitalised patients: a nationwide study. *Eur Respir J* 2021; 58: 2004474 [DOI: 10.1183/13993003.04474-2020].

This single-page version can be shared freely online.

Copyright ©The authors 2021.

This version is distributed under the terms of the Creative Commons Attribution Non-Commercial Licence 4.0. For commercial reproduction rights and permissions contact [permissions@ersnet.org](mailto:permissions@ersnet.org)

This article has supplementary material available from [erj.ersjournals.com](http://erj.ersjournals.com)

Received: 10 Dec 2020  
Accepted: 1 May 2021

## Abstract

**Background** Influenza epidemics were initially considered to be a suitable model for the COVID-19 epidemic, but there is a lack of data concerning patients with chronic respiratory diseases (CRDs), who were supposed to be at risk of severe forms of COVID-19.

**Methods** This nationwide retrospective cohort study describes patients with prior lung disease hospitalised for COVID-19 (March–April 2020) or influenza (2018–2019 influenza outbreak). We compared the resulting pulmonary complications, need for intensive care and in-hospital mortality depending on respiratory history and virus.

**Results** In the 89530 COVID-19 cases, 16.03% had at least one CRD, which was significantly less frequently than in the 45819 seasonal influenza patients. Patients suffering from chronic respiratory failure, chronic obstructive pulmonary disease, asthma, cystic fibrosis and pulmonary hypertension were under-represented, contrary to those with lung cancer, sleep apnoea, emphysema and interstitial lung diseases. COVID-19 patients with CRDs developed significantly more ventilator-associated pneumonia and pulmonary embolism than influenza patients. They needed intensive care significantly more often and had a higher mortality rate (except for asthma) when compared with patients with COVID-19 but without CRDs or patients with influenza.

**Conclusions** Patients with prior respiratory diseases were globally less likely to be hospitalised for COVID-19 than for influenza, but were at higher risk of developing severe COVID-19 and had a higher mortality rate compared with influenza patients and patients without a history of respiratory illness.

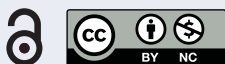

Supplement: ERJ-04474-2020.Shareable.pdf [file ERJ-04474-2020.Shareable.pdf]
